# Supplementary material
Source: PubMed Central journal article supplement (PMC4265388)
Supplement: NIHMS61314-supplement-SI.pdf [file NIHMS61314-supplement-SI.pdf]

# **Electronic supplementary information**

## Enhancing the adsorption of ionic liquids onto activated carbon by the addition of inorganic salts

*Catarina M. S. S. Neves<sup>1</sup>, Jesús Lemus<sup>2</sup>, Mara G. Freire<sup>1</sup>, Jose Palomar<sup>2</sup> and João A. P.*

*Coutinho<sup>1\*</sup>*

<sup>1</sup>Departamento de Química, CICECO, Universidade de Aveiro, 3810-193 Aveiro,  
Portugal.

<sup>2</sup>Sección de Ingeniería Química (Departamento de Química Física Aplicada),  
Universidad Autónoma de Madrid, Cantoblanco, 28049 Madrid, Spain.

\*Corresponding author

Tel: +351-234-370200; Fax: +351-234-370084; E-mail address: [jcoutinho@ua.pt](mailto:jcoutinho@ua.pt)

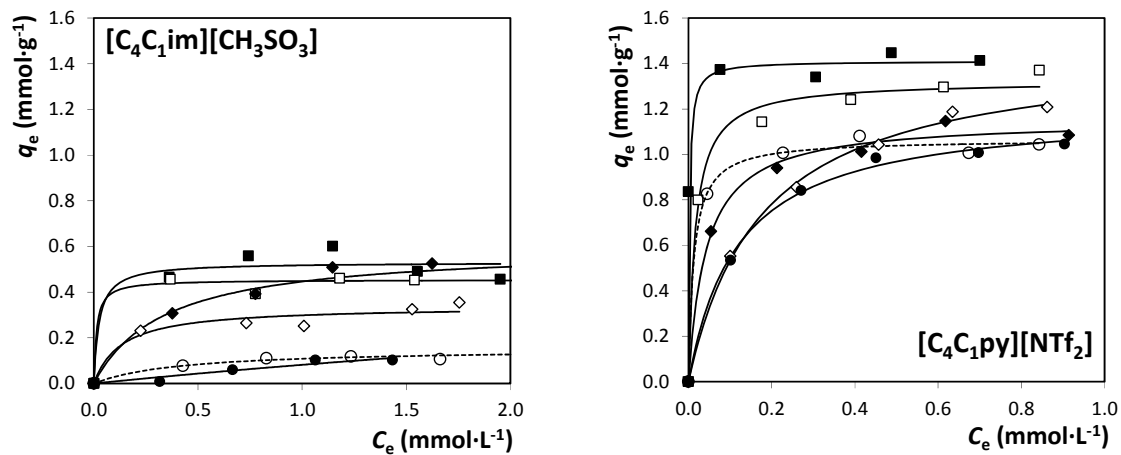

**Fig. S1** Experimental data (dots) and Langmuir fits (curves) for the adsorption equilibrium of  $[C_4C_1im][CH_3SO_3]$  and  $[C_4C_1py][NTf_2]$  onto AC-MkU at 308 K, varying the salt concentration in water ( $\circ$ ), No salt; ( $\bullet$ ),  $[Na_2SO_4] = 0.282 \text{ mol}\cdot\text{kg}^{-1}$ ; ( $\diamond$ ),  $[Na_2SO_4] = 0.704 \text{ mol}\cdot\text{kg}^{-1}$ ; ( $\blacklozenge$ ),  $[Na_2SO_4] = 1.06 \text{ mol}\cdot\text{kg}^{-1}$ ; ( $\square$ ),  $[Na_2SO_4] = 1.41 \text{ mol}\cdot\text{kg}^{-1}$ ; ( $\blacksquare$ ),  $[Na_2SO_4] = 1.76 \text{ mol}\cdot\text{kg}^{-1}$ ).
